# Supplementary material for: Cooperation of Adhesin Alleles in Salmonella-Host Tropism
Source: PubMed Central journal article supplement (PMC5343171; doi:10.1128/msphere.00066-17), 2017-03-08
Supplement: sph002172250st2.pdf [file sph002172250st2.pdf]

**Table S2A: Statistical data (P-values) of 2x2 contingency tables (Fisher's Exact Test) with strain numbers separated by sources and FimH alleles.**

| <b>FimH Host Group vs (at right)</b> | <b>Porcine</b> | <b>Avian</b>           | <b>Equine</b>          | <b>Human</b>           | <b>Environmental</b>   |
|--------------------------------------|----------------|------------------------|------------------------|------------------------|------------------------|
| Bovine                               | 0.2294         | <u><b>7.61E-06</b></u> | <u><b>0.001348</b></u> | <u><b>1.02E-06</b></u> | <u><b>7.73E-11</b></u> |
| Porcine                              | X              | <u><b>0.01035</b></u>  | 0.05256                | <u><b>0.002933</b></u> | <u><b>1.18E-05</b></u> |
| Avian                                | X              | X                      | 1                      | 0.835                  | 0.05983                |
| Equine                               | X              | X                      | X                      | 0.7816                 | 0.1511                 |
| Human                                | X              | X                      | X                      | X                      | 0.1408                 |
| Environmental                        | X              | X                      | X                      | X                      | X                      |

Tests were performed with the number of Group A and B isolates for the group at left vs the group listed at the top. Values with P<0.05 are **underlined and in bold**.

**Table S2B: Statistical data (P-values) of 2x2 contingency tables (Fisher's Exact Test) with strain numbers separated by sources and BcfD alleles.**

| <b>BcfD Host Group vs (at right)</b> | <b>Porcine</b> | <b>Avian</b>           | <b>Equine</b>         | <b>Human</b>           | <b>Environmental</b>   |
|--------------------------------------|----------------|------------------------|-----------------------|------------------------|------------------------|
| Bovine                               | 0.1025         | <u><b>2.56E-07</b></u> | <u><b>0.00339</b></u> | <u><b>8.69E-08</b></u> | <u><b>3.18E-12</b></u> |
| Porcine                              | X              | <u><b>0.005587</b></u> | 0.0526                | <u><b>0.002933</b></u> | <u><b>1.18E-05</b></u> |
| Avian                                | X              | X                      | 1                     | 1                      | 0.09342                |
| Equine                               | X              | X                      | X                     | 0.7816                 | 0.1511                 |
| Human                                | X              | X                      | X                     | X                      | 0.1408                 |
| Environmental                        | X              | X                      | X                     | X                      | X                      |

Tests were performed with the number of Group A and B isolates for the group at left vs the group listed at the top. Values with P<0.05 are **underlined and in bold**.

**Table S2C: Statistical data (P-values) of 2x2 contingency tables (Fisher's Exact Test) with strain numbers separated by sources and StfH alleles.**

| <b>StfH Host group vs (at right)</b> | <b>Porcine</b>        | <b>Avian</b>           | <b>Equine</b>          | <b>Human</b>           | <b>Environmental</b>   |
|--------------------------------------|-----------------------|------------------------|------------------------|------------------------|------------------------|
| Bovine                               | <u><b>0.01599</b></u> | <u><b>2.56E-07</b></u> | <u><b>0.000339</b></u> | <u><b>1.06E-14</b></u> | <u><b>6.92E-13</b></u> |
| Porcine                              | X                     | <u><b>0.01305</b></u>  | 0.127                  | <u><b>5.55E-06</b></u> | <u><b>5.78E-05</b></u> |
| Avian                                | X                     | X                      | 1                      | <u><b>0.01689</b></u>  | 0.0579                 |
| Equine                               | X                     | X                      | X                      | <u><b>0.03671</b></u>  | 0.1392                 |
| Human                                | X                     | X                      | X                      | X                      | 0.6411                 |
| Environmental                        | X                     | X                      | X                      | X                      | X                      |

Tests were performed with the number of Group A and B isolates for the group at left vs the group listed at the top. Values with P<0.05 are **underlined and in bold**.
