# Supplementary material for: Cooperation of Adhesin Alleles in Salmonella-Host Tropism
Source: PubMed Central journal article supplement (PMC5343171; doi:10.1128/msphere.00066-17), 2017-03-08
Supplement: sph002172250st3.pdf [file sph002172250st3.pdf]

**Table S3A:** Statistical data (unpaired t-tests, \* P < 0.05, \*\* P < 0.01, \*\*\* P < 0.001) for the numbers of adherent strains with different FimH alleles that bind to each intestinal epithelial cell line (∅, nonfimbriated empty vector control strain).

| FimH    | IPEC-J2 |     | CMS |     | J8  |     | RKO |     | Caco-2 |     |
|---------|---------|-----|-----|-----|-----|-----|-----|-----|--------|-----|
| Alleles | ∅       | A   | ∅   | A   | ∅   | A   | ∅   | A   | ∅      | A   |
| A       | ***     |     | *** |     | *** |     | *** |     | *      |     |
| B       | *       | *** | *** | *** | **  | *** | *** | *** | ***    | *** |
|         |         |     |     |     |     |     |     |     |        |     |

**Table S3B:** Statistical data (unpaired t-tests, \* P < 0.05, \*\* P < 0.01, \*\*\* P < 0.001) for the numbers of adherent strains with different BcfD alleles that bind to each intestinal epithelial cell line (∅, nonfimbriated empty vector control strain).

| BcfD    | IPEC-J2 |   | CMS |   | J8  |   | RKO |     | Caco-2 |   |
|---------|---------|---|-----|---|-----|---|-----|-----|--------|---|
| Alleles | ∅       | A | ∅   | A | ∅   | A | ∅   | A   | ∅      | A |
| A       | ***     |   | -   |   | *** |   | **  |     | -      |   |
| B       | **      | * | -   | - | **  | - | *** | *** | -      | - |

**Table S3C:** Statistical data (unpaired t-tests, \* P < 0.05, \*\* P < 0.01, \*\*\* P < 0.001) for the numbers of adherent strains with different StfH alleles that bind to each intestinal epithelial cell line (∅, nonfimbriated empty vector control strain).

| StfH    | IPEC-J2 |    |     |    | CMS |     |    |    | J8  |    |    |    | RKO |     |    |    | Caco-2 |    |    |    |
|---------|---------|----|-----|----|-----|-----|----|----|-----|----|----|----|-----|-----|----|----|--------|----|----|----|
| Alleles | ∅       | A1 | A2  | B1 | ∅   | A1  | A2 | B1 | ∅   | A1 | A2 | B1 | ∅   | A1  | A2 | B1 | ∅      | A1 | A2 | B1 |
| A1      | ***     |    |     |    | -   |     |    |    | *** |    |    |    | *** |     |    |    | -      |    |    |    |
| A2      | ***     | -  |     |    | *** | *** |    |    | -   | ** |    |    | -   | *** |    |    | -      | -  |    |    |
| B1      | **      | ** | *** |    | **  | *   | -  |    | -   | ** | -  |    | -   | *   | -  |    | -      | -  | -  |    |
| B2      | ***     | -  | -   | ** | *   | -   | -  | -  | -   | ** | -  | *  | *** | -   | *  | -  | -      | -  | -  | -  |
